# Supplementary material
Source: HighWire-hosted journal article supplement (https://jitc.bmj.com/content/8/1/e000452)
Supplement: inline-supplementary-material-1 [file inline-supplementary-material-1.pdf]

**Supplementary Table 1.**

| Characteristic                      | All Patients<br>(n=62) | HPV Positive<br>(n=35) | HPV Negative<br>(n=27) | p-value |
|-------------------------------------|------------------------|------------------------|------------------------|---------|
| <b>Age at Diagnosis</b>             |                        |                        |                        |         |
| Median (range)                      | 58 (34-83)             | 57 (34-81)             | 60 (45-83)             | 0.111   |
| <b>Sex</b>                          |                        |                        |                        |         |
| F                                   | 13 (21.0%)             | 7 (20.0%)              | 6 (22.2%)              | 1       |
| M                                   | 49 (79.0%)             | 28 (80.0%)             | 21 (77.8%)             |         |
| <b>Smoking status</b>               |                        |                        |                        |         |
| Non-smoker                          | 20 (32.3%)             | 17 (48.6%)             | 3 (11.1%)              | 0.005   |
| Ex-smoker                           | 18 (29.0%)             | 9 (25.7%)              | 9 (33.3%)              |         |
| Current smoker                      | 24 (38.7%)             | 9 (25.7%)              | 15 (55.6%)             |         |
| <b>Alcohol status (missing n=2)</b> |                        |                        |                        |         |
| Non-drinker                         | 9 (15.0%)              | 6 (17.1%)              | 3 (11.1%)              | 0.383   |
| Ex-drinker                          | 4 (6.7%)               | 3 (8.6%)               | 1 (3.7%)               |         |
| Current drinker                     | 47 (78.3%)             | 26 (74.3%)             | 21 (77.8%)             |         |
| <b>Grade</b>                        |                        |                        |                        |         |
| 1                                   | 4 (6.5%)               | 3 (8.6%)               | 1 (3.7%)               | 0.010   |
| 2                                   | 33 (53.2%)             | 13 (37.1%)             | 20 (74.1%)             |         |
| 3                                   | 25 (40.3%)             | 19 (54.3%)             | 6 (22.2%)              |         |
| <b>T stage</b>                      |                        |                        |                        |         |
| 1                                   | 12 (19.4%)             | 7 (20.0%)              | 5 (18.5%)              | 0.884   |
| 2                                   | 28 (45.2%)             | 17 (48.6%)             | 11 (40.7%)             |         |
| 3                                   | 15 (24.2%)             | 7 (20.0%)              | 8 (29.6%)              |         |
| 4                                   | 7 (11.3%)              | 4 (11.4%)              | 3 (11.1%)              |         |
| <b>N stage</b>                      |                        |                        |                        |         |
| 0                                   | 22 (35.5%)             | 10 (28.6%)             | 12 (44.4%)             | 0.632   |
| 1                                   | 10 (16.1%)             | 6 (17.1%)              | 4 (14.8%)              |         |
| 2                                   | 26 (41.9%)             | 16 (45.7%)             | 10 (37.0%)             |         |
| 3                                   | 4 (6.5%)               | 3 (8.6%)               | 1 (3.7%)               |         |
| <b>Treatment</b>                    |                        |                        |                        |         |
| Radiotherapy + Chemo                | 10 (16.1%)             | 8 (22.9%)              | 2 (7.4%)               | 0.142   |
| Surgery + Radiotherapy +/- Chemo    | 43 (69.4%)             | 24 (68.6%)             | 19 (70.4%)             |         |
| Surgery +/- Chemo                   | 9 (14.5%)              | 3 (8.6%)               | 6 (22.2%)              |         |
| <b>PD-L1 status</b>                 |                        |                        |                        |         |
| Pos                                 | 53 (85.5%)             | 33 (94.3%)             | 20 (74.1%)             | 0.034   |
| Neg                                 | 9 (14.5%)              | 2 (5.7%)               | 7 (25.9%)              |         |
