# Supplementary material
Source: HighWire-hosted journal article supplement (https://jitc.bmj.com/content/8/1/e000452)

Supplementary Figure 1 .

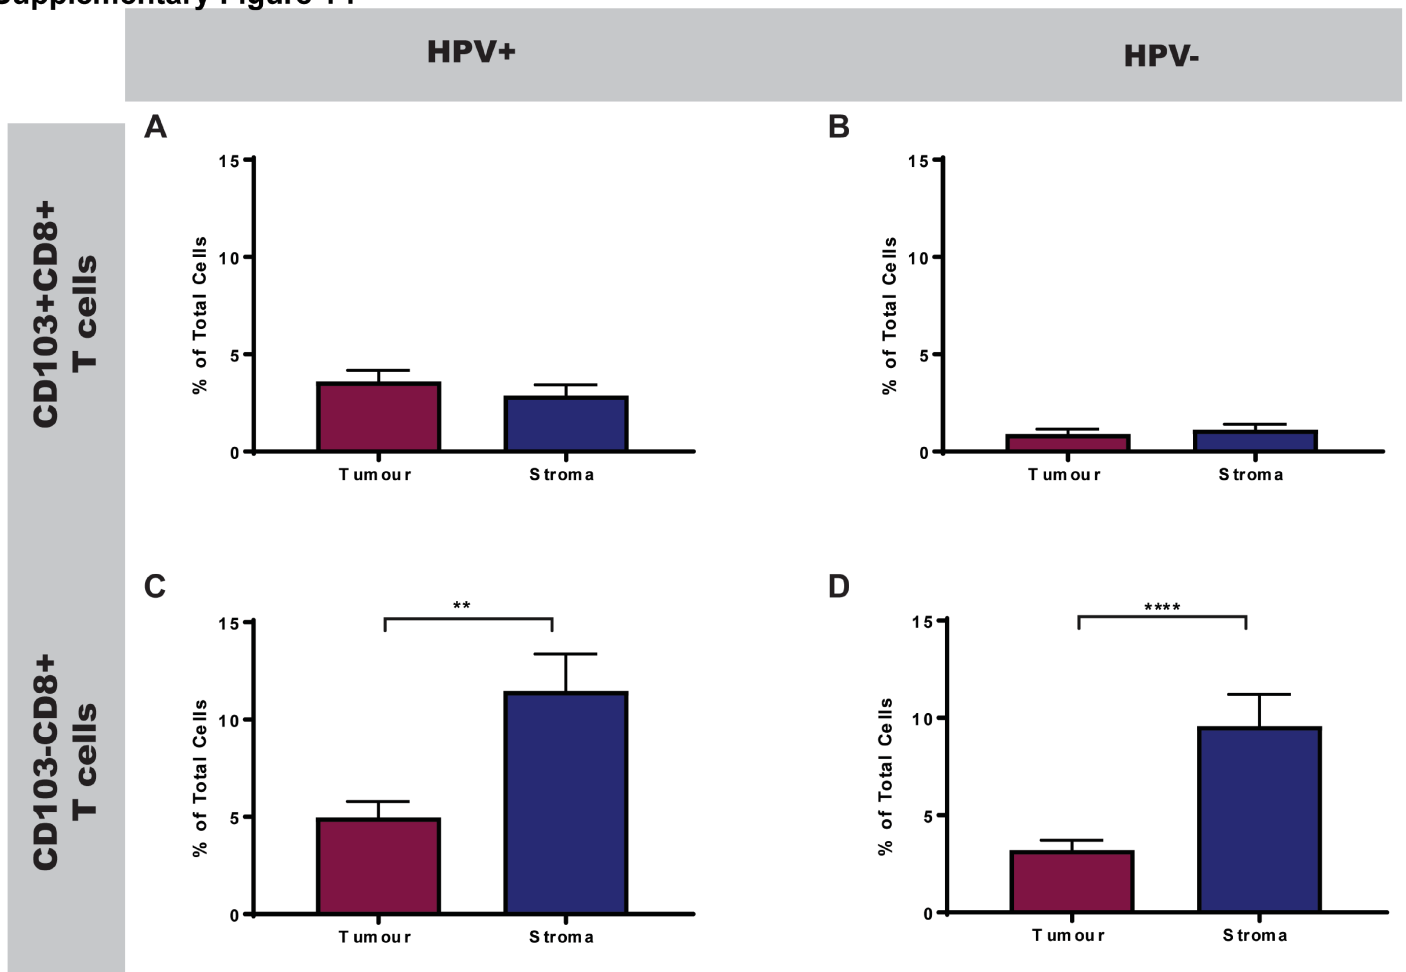

Supplement: inline-supplementary-material-3 [file inline-supplementary-material-3.pdf]

Supplementary Figure 2.

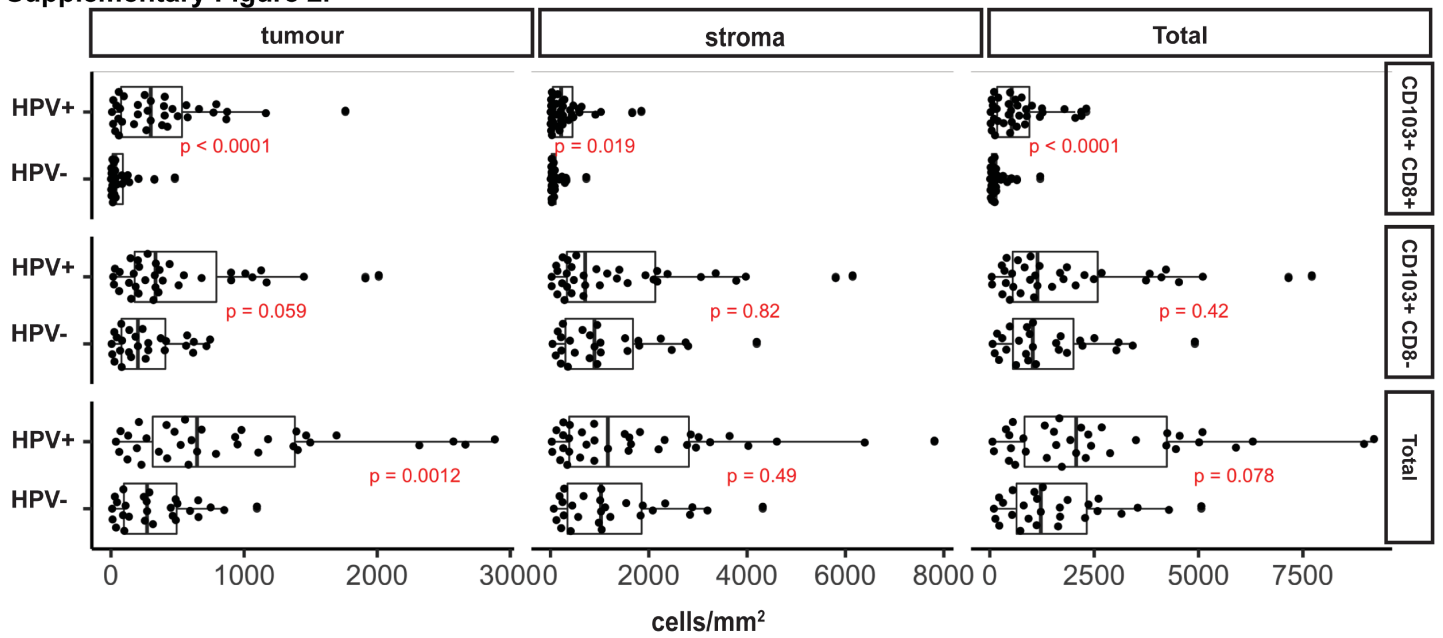

Supplement: inline-supplementary-material-4 [file inline-supplementary-material-4.pdf]
